# Supplementary material
Source: PubMed Central journal article supplement (PMC6583436)
Supplement: jamapediatr-173-52-s001.pdf [file jamapediatr-173-52-s001.pdf]

## Supplementary Online Content

Mulkey SB, Bulas DI, Vezina G, et al. Sequential neuroimaging of the fetus and newborn with in utero Zika virus exposure. *JAMA Pediatr*. Published online November 26, 2018. doi:10.1001/jamapediatrics.2018.4138

**eTable.** Postnatal Neuroimaging Findings on Brain MRI and Cranial US

This supplementary material has been provided by the authors to give readers additional information about their work.

**eTable. Postnatal Neuroimaging Findings on Brain MRI and Cranial US**

|                                       | <b>No. (%)</b> |
|---------------------------------------|----------------|
| <b>Brain MRI findings (n=53)</b>      | <b>7 (13)</b>  |
| White matter injury or hemorrhage     | 2 (4)          |
| Choroid plexus hemorrhage             | 1 (2)          |
| Area of gliosis in basal ganglia      | 1 (2)          |
| Germinolytic cyst                     | 2 (2)          |
| Infarct                               | 1 (2)          |
| <b>Cranial US findings (n=57)</b>     | <b>21 (37)</b> |
| Lenticulostriate vasculopathy         | 4 (7)          |
| Choroid plexus cysts                  | 8 (14)         |
| Germinolytic cysts/subependymal cysts | 12 (21)        |
| Calcification                         | 1 (2)          |
